# Supplementary material for: Aspects in cell design for H2O2 electrosynthesis and its integration in tandem systems
Source: Royal Society of Chemistry journal article supplement (doi:10.1039/d4ey00232f), 2025-01-01
Supplement: d4ey00232f1.pdf [file d4ey00232f1.pdf]

## Supplementary information

### Aspects in Cell Design for H<sub>2</sub>O<sub>2</sub> Electrosynthesis and Its Integration in Tandem Systems

Wenhao Chen<sup>a</sup>, Chang Sun<sup>a</sup>, and Wenchao Sheng<sup>a,\*</sup>

<sup>a</sup>State Key Laboratory of Pollution Control and Resource Reuse,  
College of Environmental Science and Engineering, Tongji University,  
Shanghai Institute of Pollution Control and Ecological Security, Shanghai 200092, P. R. China  
Email: [wsheng@tongji.edu.cn](mailto:wsheng@tongji.edu.cn)

**Table S1. Performance comparison of GDE reactor**

| <b>GDE reactor</b>      | <b>anodic reaction</b> | <b>co-generation of electricity</b> | <b>H<sub>2</sub>O<sub>2</sub> production rate (mmol cm<sup>-2</sup> h<sup>-1</sup>)</b> | <b>H<sub>2</sub>O<sub>2</sub> Faradaic efficiency</b> | <b>stability</b> | <b>Ref</b> |
|-------------------------|------------------------|-------------------------------------|-----------------------------------------------------------------------------------------|-------------------------------------------------------|------------------|------------|
| flow-cell               | OER                    | No                                  | 3.3~6.1                                                                                 | 85~95%                                                | 100~400 h        | 1-3        |
| membrane-free flow-cell | OER                    | No                                  | -                                                                                       | >90%                                                  | 2 h              | 4          |
| PEMFC                   | HOR                    | Yes                                 | 0.36~2.3                                                                                | 20~70%                                                | 80~120 h         | 5-7        |
| AEMFC                   | HOR                    | Yes                                 |                                                                                         |                                                       |                  | n/a        |
| SE-cell (CEM and AEM)   | HOR                    | Yes                                 | 3.4~4.35                                                                                | 80~95%                                                | 100~500 h        | 1, 8, 9    |
| SE-cell (CEM)           | HOR                    | Yes                                 | 6.53                                                                                    | >90%                                                  | 50 h             | 10         |
| SE-cell (AEM)           | HOR                    | Yes                                 |                                                                                         |                                                       |                  | n/a        |
| Zn-Air battery          | Zinc oxidation         | Yes                                 | 0.593                                                                                   | 85~92.5%                                              | 4~8 h            | 11, 12     |

**Table S2. Summary of electrocatalyst performances in RRDE and GDE reactor from 2022 to 2024**

**(RRDE performances)**

| <b>catalyst type</b>                     | <b>electrocatalyst</b> | <b>electrolyte</b>                    | <b>onset potential<br/>(V vs. RHE)</b> | <b>H<sub>2</sub>O<sub>2</sub> selectivity</b> | <b>stability</b> | <b>Ref</b> |
|------------------------------------------|------------------------|---------------------------------------|----------------------------------------|-----------------------------------------------|------------------|------------|
| <b>metal-free carbon-based catalysts</b> | N-C (2:3)              | -                                     | -                                      | -                                             | -                | 10         |
|                                          | PD/N-C                 | 0.1 M HClO <sub>4</sub>               | 0.6                                    | >90%@0.2~0.5 V                                | 10 h@0.3 V       | 13         |
|                                          | BP2000                 | -                                     | -                                      | -                                             | -                | 9          |
|                                          | SCN                    | 0.1 M HClO <sub>4</sub>               | 0.59                                   | >70%@0~0.4 V                                  | 28 h@0.2 V       | 14         |
|                                          | SCN                    | 0.1 M Na <sub>2</sub> SO <sub>4</sub> | 0.5                                    | >90%@ 0.1~0.4 V                               | 28 h@0.2 V       |            |
|                                          | MeCN                   | 0.1 M KOH                             | 0.85                                   | >90%@0.2~0.8 V                                | 9 h@0.5 V        | 15         |
|                                          | MHCS <sub>0.5</sub>    | 0.1 M KOH                             | 0.85                                   | >90%@0.2~0.8 V                                | 12 h@0.5 V       | 16         |
|                                          | MHCS <sub>0.6</sub>    | 0.1 M PBS                             | 0.6                                    | >85%@0.1~0.5 V                                | 12 h@0.5 V       |            |
|                                          | BN-C/rGO               | 0.1 M KOH                             | 0.78                                   | >80%@0.35~0.75 V                              | 12 h@0.4 V       | 17         |
|                                          | PBT                    | 0.5 M KOH                             | 0.77                                   | >90%@0.45~0.75 V                              | 12 h@0.6 V       | 18         |
|                                          | BS-C-3                 | 0.1 M KOH                             | 0.80                                   | >90%@0.3~0.7 V                                | 12 h@0.5 V       | 19         |
|                                          | CB-PDA-A               | 0.1 M KOH                             | 0.83                                   | >95%@0.4~0.7 V                                | 12 h@0.5 V       | 20         |
|                                          | O-CDs-3                | 0.1 M KOH                             | 0.7                                    | >75%@0.2~0.5 V                                | -                | 21         |
|                                          | B/N-onion carbon       | -                                     | -                                      | -                                             | -                | 22         |
|                                          | N,S-TCNTs              | 0.1 M KOH                             | 0.78                                   | >90%@0.2~0.8 V                                | 12 h@0.5 V       | 1          |
|                                          | BC-C-1                 | 0.1 M KOH                             | 0.79                                   | >80%@0.45~0.75 V                              | 10 h@0.4 V       | 23         |
|                                          | NBO-G/CNTs             | 0.1 M KOH                             | 0.75                                   | >80%@0.2~0.75 V                               | 12 h@0.4 V       | 24         |
|                                          | E-BPC                  | 0.1 M KOH                             | 0.8                                    | >80%@0.3~0.7 V                                | 10 h@0.6 V       | 25         |
|                                          | VG array               | -                                     | -                                      | -                                             | -                | 26         |

|                                     |                                                      |                                       |       |                |              |    |
|-------------------------------------|------------------------------------------------------|---------------------------------------|-------|----------------|--------------|----|
|                                     | CNB-ZIL                                              | 0.1 M KOH                             | 0.8   | >70%@0~0.7 V   | 12 h@0.3 V   | 27 |
|                                     | CB                                                   | -                                     | -     | -              | -            | 28 |
|                                     | g-C <sub>3</sub> N <sub>4</sub> /CNT                 | 0.1 M KOH                             | 0.8   | >90%@0.1~0.6 V | 10 h@0.5 V   | 29 |
|                                     | CB                                                   | 0.2 Mm DTAB +<br>0.1 M KOH            | 0.7   | >80%@0.1~0.6 V | -            | 30 |
|                                     | N,O-CNS <sub>0.5</sub>                               | 0.1 M K <sub>2</sub> SO <sub>4</sub>  | 0.65  | >80%@0.1~0.6 V | 12 h@0.3 V   | 31 |
|                                     | CBNO                                                 | 0.1 M Na <sub>2</sub> SO <sub>4</sub> | 0.55  | >80%@0~0.6 V   | 10 h@0.1 V   | 32 |
|                                     | HCB(N/O)                                             | 0.1 M H <sub>2</sub> SO <sub>4</sub>  | 0.35  | >90%@0~0.3 V   | 12 h@0.25 V  | 33 |
|                                     | O-DG-30                                              | 0.1 M KOH                             | 0.81  | ~80%@0.3~0.7 V | -            | 34 |
|                                     | COPN-3                                               | 0.1 M KOH                             | 0.65  | >90%@0~0.6 V   | 90 h@0.4 V   | 35 |
|                                     | N-CBMC-500                                           | 0.1 M KOH                             | 0.7   | >90%@0~0.6 V   | 10 h@0.4 V   | 36 |
|                                     | o-CNT-8                                              | 0.1 M KOH                             | 0.795 | >90%@0.4~0.7 V | -            | 37 |
|                                     | C-0.1M80                                             | 0.1 M KOH                             | 0.795 | >80%@0.2~0.6 V | -            | 38 |
| <b>non-precious metal catalysts</b> | CoSe <sub>2-x</sub> -1                               | 0.1 M HClO <sub>4</sub>               | 0.73  | >80%@0.2~0.6 V | -            | 39 |
|                                     | CoIn-N-C                                             | 0.1 M HClO <sub>4</sub>               | 0.78  | >80%@0.4~0.7 V | -            | 40 |
|                                     | CoPc-OCNT                                            | -                                     | -     | -              | -            | 41 |
|                                     | p-Co-N-C                                             | 0.5 M H <sub>2</sub> SO <sub>4</sub>  | 0.65  | >80%@0~0.6 V   | -            | 42 |
|                                     | CoN <sub>4</sub> /VG                                 | -                                     | -     | -              | -            | 43 |
|                                     | Co-N-C/Ti <sub>3</sub> C <sub>2</sub> T <sub>x</sub> | 0.5 M H <sub>2</sub> SO <sub>4</sub>  | 0.72  | >60%@0.2~0.7 V | -            | 44 |
|                                     | Co-N SAC <sub>Dp</sub>                               | 0.1 M HClO <sub>4</sub>               | 0.65  | >90%@0.1~0.6 V | 5.5 h@0.25 V | 45 |
|                                     | Co <sub>2</sub> -DAC                                 | 0.1 M HClO <sub>4</sub>               | 0.72  | >90%@0.1~0.6 V | 12 h@0.3 V   | 2  |
|                                     | CoTPP@RGO-160                                        | 0.5 M H <sub>2</sub> SO <sub>4</sub>  | 0.6   | >90%@0.1~0.4 V | 8 h@0.1 V    | 46 |
|                                     | ZnO@ZnO <sub>2</sub>                                 | 0.1 M K <sub>2</sub> SO <sub>4</sub>  | 0.5   | ~100%@0~0.4 V  | 40 h@0.1 V   | 47 |
|                                     | h-SnO <sub>2</sub>                                   | 0.1 M Na <sub>2</sub> SO <sub>4</sub> | 0.48  | >95%@0~0.4 V   | -            | 48 |
|                                     | ZnO/rGO                                              | -                                     | -     | -              | -            | 49 |

|                                 |                                                  |                                       |       |                  |             |    |
|---------------------------------|--------------------------------------------------|---------------------------------------|-------|------------------|-------------|----|
|                                 | P-hcp Ni                                         | 0.1 M Na <sub>2</sub> SO <sub>4</sub> | 0.42  | >95%@0~0.2 V     | 9 h@0.2 V   | 50 |
|                                 | ZnO-v                                            | 0.6 M K <sub>2</sub> SO <sub>4</sub>  | 0.43  | >80%@0.1~0.4 V   | -           | 51 |
|                                 | L-ZnO                                            | 0.6 M K <sub>2</sub> SO <sub>4</sub>  | 0.35  | >80%@0.05~0.35 V | -           | 52 |
|                                 | Co <sub>1</sub> -NBC                             | 0.1 M HClO <sub>4</sub>               | 0.724 | ~90%@0.2~0.6 V   | 10 h@0.35 V | 53 |
|                                 | CoN <sub>4</sub> C-N                             | 0.1 M HClO <sub>4</sub>               | 0.72  | >80%@0.1~0.6 V   | -           | 54 |
|                                 | Co-N <sub>3</sub> O                              | 0.1 M KOH                             | 0.8   | ~90%@0.1~0.6 V   | -           | 55 |
|                                 | Ni-N <sub>3</sub> S                              | 0.1 M KOH                             | 0.8   | ~90%@0.1~0.6 V   | -           | 55 |
|                                 | TiO <sub>2</sub> @Ti <sub>2</sub> O <sub>3</sub> | 0.1 M KOH                             | 0.78  | >80%@0.1~0.6 V   | 12 h@0.2 V  | 56 |
|                                 | CoPorF/CNT                                       | 0.1 M HClO <sub>4</sub>               | 0.62  | ~90%@0.2~0.5 V   | -           | 57 |
|                                 | Mn CD/C                                          | 0.1 M KOH                             | 0.786 | >90%@0.2~0.7 V   | 10 h@0.5 V  | 58 |
|                                 | F/Co-N-G                                         | 0.1 M KOH                             | 0.81  | >80%@0.1~0.8 V   | 10 h@0.1 V  | 59 |
|                                 | E-Niln                                           | 0.1 M KOH                             | 0.72  | >90%@0.1~0.6 V   | 24 h@0.55 V | 60 |
|                                 | CoPc-S-COF                                       | 0.1 M KOH                             | 0.8   | >80%@0.2~0.7 V   | 10 h@0.52 V | 61 |
|                                 | Pb SA/OSC                                        | 0.1 M KOH                             | 0.76  | >90%@0.3~0.7 V   | -           | 62 |
| <b>Precious metal catalysts</b> | a-PdSe <sub>2</sub> NP/C                         | 0.1 M HClO <sub>4</sub>               | 0.57  | >90%@0~0.3 V     | 10 h@0 V    | 63 |
|                                 | Pt-N-CNT-Gly                                     | 0.1 M HClO <sub>4</sub>               | 0.45  | >80%@0.05~0.45 V | 14 h@0.3 V  | 64 |
|                                 | Se <sub>2</sub> -Pt                              | 0.1 M HClO <sub>4</sub>               | 0.7   | >95%@0~0.6 V     | 15 h@0 V    | 3  |
|                                 | PdSe <sub>2</sub>                                | 0.05 M NaPi                           | 0.6   | >60%@0~0.6 V     | -           | 65 |
|                                 | Pd/MCS-8                                         | 0.1 M K <sub>2</sub> SO <sub>4</sub>  | 0.65  | >90%@0.1~0.6 V   | 12 h@0.3 V  | 66 |
|                                 | Pd SNCs/NiTe <sub>2</sub>                        | 0.1 M KOH                             | 0.81  | >80%@0.3~0.6 V   | 20 h@0.4 V  | 67 |

**Table S3. Summary of electrocatalyst performances in RRDE and GDE reactor from 2022 to 2024**

**(Reactor performances)**

| <b>catalyst type</b>                     | <b>electrocatalyst</b> | <b>GDE reactor</b> | <b>electrolyte</b>                                                            | <b>current density (mA cm<sup>-2</sup>)</b> | <b>H<sub>2</sub>O<sub>2</sub> production rate (mmol cm<sup>-2</sup> h<sup>-1</sup>)</b> | <b>H<sub>2</sub>O<sub>2</sub> Faradaic efficiency</b> | <b>stability</b>              | <b>Ref</b> |
|------------------------------------------|------------------------|--------------------|-------------------------------------------------------------------------------|---------------------------------------------|-----------------------------------------------------------------------------------------|-------------------------------------------------------|-------------------------------|------------|
| <b>metal-free carbon-based catalysts</b> | N-C (2:3)              | CEM-SE-cell        | pure water                                                                    | 389@2.35 V                                  | 6.53@2.35 V                                                                             | >90%                                                  | 50 h@70 mA cm <sup>-2</sup>   | 10         |
|                                          | PD/N-C                 | flow-cell          | 0.1 M HClO <sub>4</sub>                                                       | 38@-0.6 V                                   | -                                                                                       | ~98%                                                  | 144 h@-0.6 V                  | 13         |
|                                          | BP2000                 | flow-cell          | 0.1 M H <sub>2</sub> SO <sub>4</sub> + 0.05 M Na <sub>2</sub> SO <sub>4</sub> | 400@-0.9 V                                  | 6.5@-0.9 V                                                                              | >80%                                                  | 20 h@200 mA cm <sup>-2</sup>  |            |
|                                          | BP2000                 | MEA(ORR-OER)       | 0.1 M H <sub>2</sub> SO <sub>4</sub> + 0.05 M Na <sub>2</sub> SO <sub>4</sub> | 70 @1.7 V                                   | -                                                                                       | ~10%                                                  | -                             | 9          |
|                                          | BP2000                 | double-PEM SE      | 0.03 M Na <sub>2</sub> SO <sub>4</sub>                                        | 50@1.85 V                                   | -                                                                                       | ~90%                                                  | 500 h@50 mA cm <sup>-2</sup>  |            |
|                                          | SCN                    | flow-cell          | 0.1 M HClO <sub>4</sub>                                                       | 100@-0.8 V                                  | 1.3@100 mA cm <sup>-2</sup>                                                             | ~70%                                                  | 168 h@100 mA cm <sup>-2</sup> | 14         |
|                                          | SCN                    | flow-cell          | 1 M Na <sub>2</sub> SO <sub>4</sub>                                           | 100@0 V                                     | 1.65@100 mA cm <sup>-2</sup>                                                            | ~90%                                                  | 168 h@100 mA cm <sup>-2</sup> |            |
|                                          | MeCN                   | flow-cell          | 0.1 M KOH                                                                     | 200@0.2 V                                   | 3.6@0.2 V                                                                               | >90%                                                  | 24 h@0.2 V                    | 15         |
|                                          | MHCS <sub>0.5</sub>    | flow-cell          | 0.1 M KOH                                                                     | 250@0.1 V                                   | 4.3@0.1 V                                                                               | >90%                                                  | 16 h@0.1 V                    | 16         |
|                                          | MHCS <sub>0.6</sub>    | flow-cell          | 0.1 M PBS                                                                     | 175@0.1 V                                   | 3.16@0.1 V                                                                              | >90%                                                  | 16 h@0.1 V                    |            |
|                                          | BN-C/rGO               | flow-cell          | 0.1 M KOH                                                                     | 50@0.2 V                                    | 0.96@0.2 V                                                                              | 70~100%                                               | 8 h@0.2 V                     | 17         |
| PBT                                      | flow-cell              | 1.0 M KOH          | 100@0.4 V                                                                     | 1.88@100 mA cm <sup>-2</sup>                | >80%                                                                                    | 50 h@100 mA cm <sup>-2</sup>                          | 18                            |            |

|                                      |           |                                      |            |                              |        |                                  |    |
|--------------------------------------|-----------|--------------------------------------|------------|------------------------------|--------|----------------------------------|----|
| BS-C-3                               | flow-cell | 0.1 M KOH                            | 50@0.2 V   | 0.75@50 mA cm <sup>-2</sup>  | >90%   | 11 h@0.2 V                       | 19 |
| CB-PDA-A                             | flow-cell | 0.1 M KOH                            | 60@1.5 V   | 0.54@1.5 V                   | >90%   | 250 h@1.5 V                      | 20 |
| O-CDs-3                              | flow-cell | 0.1 M KOH +<br>10 Mm EDTA            | -          | -                            | >70%   | 10 h@10 mA<br>cm <sup>-2</sup>   | 21 |
| B/N-onion carbon                     | flow-cell | 1 M KOH                              | 100@0.4 V  | 1.75@0.4 V                   | >95%   | 12 h@0.2 V                       | 22 |
| N,S-TCNTs                            | flow-cell | 1 M KOH                              | 300@0.5 V  | 6.07@350 mA cm <sup>-2</sup> | ~95%   | 200 h@32 mA<br>cm <sup>-2</sup>  | 1  |
| N,S-TCNTs                            | SE cell   | pure water                           | 300@2.7 V  | 4.35@300 mA cm <sup>-2</sup> | ~70%   | 300 h@20 mA<br>cm <sup>-2</sup>  |    |
| BC-C-1                               | flow-cell | 1 M KOH                              | 50@0.3 V   | 0.76@0.3 V                   | >75%   | 12 h@0.3 V                       | 23 |
| NBO-G/CNTs                           | flow-cell | 1 M KOH                              | 50@0.2 V   | 0.71@0.2 V                   | 80~50% | 12 h@0.2 V                       | 24 |
| E-BPC                                | flow-cell | 1 M KOH                              | 300@0.67 V | 4.7@300 mA cm <sup>-2</sup>  | >80%   | 100 h@100 mA<br>cm <sup>-2</sup> | 25 |
| E-BPC                                | flow-cell | 1 M Na <sub>2</sub> SO <sub>4</sub>  | 300@0.27 V | 4.76@300 mA cm <sup>-2</sup> | >80%   | 24 h@100 mA<br>cm <sup>-2</sup>  |    |
| VG array                             | flow-cell | 0.1 M KOH                            | 100@0.4 V  | 1.80@100 mA cm <sup>-2</sup> | ~90%   | 16 h@100 mA<br>cm <sup>-2</sup>  | 26 |
| CNB-ZIL                              | flow-cell | 0.1 M KOH                            | 50@1.4 V   | -                            | ~80%   | 9 h@1.4 V                        | 27 |
| CB                                   | flow-cell | 0.1 M NaClO <sub>4</sub>             | -          | 0.57@28 mA cm <sup>-2</sup>  | >80%   |                                  | 28 |
| g-C <sub>3</sub> N <sub>4</sub> /CNT | flow-cell | 1 M KOH                              | 100@0.37 V | -                            | >90%   | 8 h@100 mA<br>cm <sup>-2</sup>   | 29 |
| CB                                   | flow-cell | 0.2 Mm DTAB<br>+ 0.1 M KOH           | 10@0.2 V   | -                            | ~90%   | 30 h@0.2 V                       | 30 |
| N,O-CNS <sub>0.5</sub>               | flow-cell | 0.1 M K <sub>2</sub> SO <sub>4</sub> | 100@0.2 V  | 1.67@0.2 V                   | >90%   | 24 h@0.2 V                       | 31 |
| CBNO                                 | flow-cell | 1 M Na <sub>2</sub> SO <sub>4</sub>  | 100@-0.4 V | 1.34@100 mA cm <sup>-2</sup> | >90%   | 24 h@100 mA<br>cm <sup>-2</sup>  | 32 |

|                                     |                                                      |                                   |                                               |            |                              |       |                               |    |
|-------------------------------------|------------------------------------------------------|-----------------------------------|-----------------------------------------------|------------|------------------------------|-------|-------------------------------|----|
|                                     | HCB(N/O)                                             | flow-cell                         | 0.1 M H <sub>2</sub> SO <sub>4</sub>          | 31@-0.5 V  | -                            | ~90%  | 80 h@-0.5 V                   | 33 |
|                                     | O-DG-30                                              | flow-cell                         | 0.1 M KOH                                     | 35@0.50 V  | 0.59@0.50 V                  | >95%  | 10 h@0.5 V                    | 34 |
|                                     |                                                      |                                   | 1 M KOH                                       | -          | 1.76@130 mA cm <sup>-2</sup> | ~70%  | -                             |    |
|                                     | COPN-3                                               | flow-cell                         | 0.5 M Na <sub>2</sub> SO <sub>4</sub>         | 130@-2 V   | 2.57@130 mA cm <sup>-2</sup> | ~100% | 70 h@130 mA cm <sup>-2</sup>  | 35 |
|                                     |                                                      |                                   | 0.5 M H <sub>2</sub> SO <sub>4</sub>          | -          | 0.66@130 mA cm <sup>-2</sup> | ~25%  | -                             |    |
|                                     |                                                      |                                   | 1 M KOH                                       | -          | 0.42@-1.2 V                  | ~60%  | -                             |    |
|                                     | N-CBMC-500                                           | flow-cell                         | 0.5 M Na <sub>2</sub> SO <sub>4</sub>         | -          | 0.49@-0.65 V                 | ~70%  | -                             | 36 |
|                                     |                                                      |                                   | 0.5 M H <sub>2</sub> SO <sub>4</sub>          | -          | 0.24@-0.9 V                  | ~30%  | -                             |    |
|                                     | o-CNT-8                                              | SE-cell                           | pure water                                    | 93@4 V     | 1.59@4 V                     | ~92%  | 100 h@4 V                     | 37 |
|                                     | C-0.1M80                                             | SE-cell (HOR-2e <sup>-</sup> ORR) | pure water                                    | 100@1 V    | 1.79@100 mA cm <sup>-2</sup> | 95.8% | 200 h@100 mA cm <sup>-2</sup> | 38 |
|                                     | CoSe <sub>2-x</sub> -1                               | flow-cell                         | 0.1 M HClO <sub>4</sub>                       | 10@0 V     | -                            | 70%   | 32 h@0 V                      | 39 |
|                                     | CoIn-N-C                                             | flow-cell                         | 0.1 M HClO <sub>4</sub>                       | 100@0.2 V  | 1.94@100 mA cm <sup>-2</sup> | ~80%  | 4 h@100 mA cm <sup>-2</sup>   | 40 |
|                                     | CoPc-OCNT                                            | flow-cell                         | 0.3 M K <sub>2</sub> SO <sub>4</sub> (pH=1.5) | -          | 5.75@300 mA cm <sup>-2</sup> | ~100% | -                             | 41 |
| <b>non-precious metal catalysts</b> | p-Co-N-C                                             | flow-cell                         | 0.5 M H <sub>2</sub> SO <sub>4</sub>          | 35@0 V     | -                            | >80%  | 4 h@0.1 V                     | 42 |
|                                     | CoN <sub>4</sub> /VG                                 | flow-cell                         | 0.1 M HClO <sub>4</sub>                       | 24@1.8 V   | 0.304@1.8 V                  | ~70%  | 6 h@1.8 V                     | 43 |
|                                     | Co-N-C/Ti <sub>3</sub> C <sub>2</sub> T <sub>x</sub> | flow-cell                         | 0.5 M H <sub>2</sub> SO <sub>4</sub>          | 75@0.1 V   | 2.8@0.1 V                    | ~75   | 20 h@0.1 V                    | 44 |
|                                     | Co-N SAC <sub>Dp</sub>                               | flow-cell                         | 0.1 M HClO <sub>4</sub>                       | 50@0 V     | 0.78@50 mA cm <sup>-2</sup>  | >70%  | 90 h@0.1 V                    | 45 |
|                                     |                                                      |                                   |                                               | 50@0 V     | 0.85@50 mA cm <sup>-2</sup>  | ~90%  | 100 h@50 mA cm <sup>-2</sup>  |    |
|                                     | Co <sub>2</sub> -DAC                                 | flow-cell                         | 0.1 M HClO <sub>4</sub>                       | 200@-0.8 V | 3.3@200 mA cm <sup>-2</sup>  | ~85%  | 100 h@200 mA cm <sup>-2</sup> | 2  |
|                                     |                                                      |                                   |                                               |            |                              |       |                               |    |



|                      |                                 |                                      |            |                               |      |                                |    |
|----------------------|---------------------------------|--------------------------------------|------------|-------------------------------|------|--------------------------------|----|
| CoTPP@RGO-160        | flow-cell                       | 0.5 M H <sub>2</sub> SO <sub>4</sub> | 200@-0.6 V | 3.1@200 mA cm <sup>-2</sup>   | >80% | 16 h@200 mA cm <sup>-2</sup>   | 46 |
|                      | PEMWE (OER-2e <sup>-</sup> ORR) | pure water                           | 400@2.1 V  | -                             | -    | 225 h@ 400 mA cm <sup>-2</sup> |    |
| ZnO@ZnO <sub>2</sub> | flow-cell                       | 0.1 M K <sub>2</sub> SO <sub>4</sub> | 125@0.1 V  | 2.2@0.1V                      | ~95% | 50 h@0.1 V                     | 47 |
| h-SnO <sub>2</sub>   | flow-cell                       | 1M Na <sub>2</sub> SO <sub>4</sub>   | 124@0 V    | 2.06@0 V                      | ~90% | 40 h@120 mA cm <sup>-2</sup>   | 48 |
| h-SnO <sub>2</sub>   | flow-cell                       | pure water                           | 100@0 V    | -                             | -    | 20 h@0 V                       |    |
| ZnO/rGO              | flow-cell                       | 0.6 M K <sub>2</sub> SO <sub>4</sub> | 500@-0.8 V | 9.7@-0.8 V                    | ~90% | 24 h@200 mA cm <sup>-2</sup>   | 49 |
| ZnO/rGO              | tandem-parallel flow-cell       | 0.6 M K <sub>2</sub> SO <sub>4</sub> | 455@-0.8 V | 8.73@-0.8 V                   | ~90% | 24 h@100 mA cm <sup>-2</sup>   |    |
| P-hcp Ni             | flow-cell                       | pure water                           | 150@-1 V   | 2.42@150 mA cm <sup>-2</sup>  | ~90% | 120 h@-1 V                     | 50 |
|                      |                                 | sea water                            | 180@-1 V   | 2.5 @-1 V                     | ~90% | 3 h@-1 V                       |    |
|                      |                                 | pure water                           | 150@-0.6 V | 2.44@150 mA cm <sup>-2</sup>  | ~90% | 130 h@150 mA cm <sup>-2</sup>  |    |
| ZnO-v                | flow-cell                       | 0.6 M K <sub>2</sub> SO <sub>4</sub> | -          | 18.3@1000 mA cm <sup>-2</sup> | >95% | 20 h@200 mA cm <sup>-2</sup>   | 51 |
| L-ZnO                | flow-cell                       | 0.6 M K <sub>2</sub> SO <sub>4</sub> | -          | 18.2@1000 mA cm <sup>-2</sup> | ~95% | 20 h@200 mA cm <sup>-2</sup>   | 52 |
| Co <sub>1</sub> -NBC | flow-cell                       | 0.5 M H <sub>2</sub> SO <sub>4</sub> | 350@-0.5 V | 5.96@350 mA cm <sup>-2</sup>  | ~86% | 60 h@200 mA cm <sup>-2</sup>   | 53 |
| CoN <sub>4</sub> C-N | flow-cell                       | 0.1 M HClO <sub>4</sub>              | 10@0.358 V | 0.096@0.358 V                 | ~82% | 200 h@0.358 V                  | 54 |
| Co-N <sub>3</sub> O  | flow-cell                       | 1 M KOH                              | 110@0.1 V  | 1.42@0.1 V                    | ~90% | 12 h@0.1 V                     | 55 |

|                                         |                                                  |           |                                                                                   |            |                                    |      |                                  |    |
|-----------------------------------------|--------------------------------------------------|-----------|-----------------------------------------------------------------------------------|------------|------------------------------------|------|----------------------------------|----|
|                                         | Ni-N <sub>3</sub> S                              | flow-cell | 1 M KOH                                                                           | 110@0.2 V  | 1.75@0.2 V                         | ~90% | 12 h@0.2 V                       |    |
|                                         | TiO <sub>2</sub> @Ti <sub>2</sub> O <sub>3</sub> | SE-cell   | pure water                                                                        | 200@2.5 V  | -                                  | >80% | 100 h@2.28 V                     | 56 |
|                                         | CoPorF/CNT                                       | SE-cell   | pure water                                                                        | 50@2.7 V   | 5.38@3.02 V                        | ~80% | 48 h@50 mA<br>cm <sup>-2</sup>   | 57 |
|                                         | Mn CD/C                                          | flow-cell | 1 M KOH                                                                           | 200@0.5 V  | -                                  | ~80% | 50 h@200 mA<br>cm <sup>-2</sup>  | 58 |
|                                         | F/Co-N-G                                         | flow-cell | 1 M KOH                                                                           | 70@0.3 V   | 1.21@0.3 V                         | ~70% | 80 h@0.3 V                       | 59 |
|                                         | E-Niln                                           | flow-cell | 0.1 M KOH                                                                         | 200@0.4 V  | 2.4@0.4 V                          | ~90% | 20 h@200 mA<br>cm <sup>-2</sup>  | 60 |
|                                         | CoPc-S-COF                                       | flow-cell | 1 M KOH                                                                           | 125@0.67 V | -                                  | ~90% | 20 h@125 mA<br>cm <sup>-2</sup>  | 61 |
|                                         | Pb SA/OSC                                        | flow-cell | 1 M KOH                                                                           | -          | 6.9@400 mA cm <sup>-2</sup>        | 93%  | 100 h@50 mA<br>cm <sup>-2</sup>  | 62 |
| <b>Precious<br/>metal<br/>catalysts</b> | a-PdSe <sub>2</sub> NP/C                         | flow-cell | 0.1 M HClO <sub>4</sub>                                                           | 50@-0.5 V  | 0.70@0 V                           | >80% | 2 h@50 mA cm <sup>-2</sup>       | 63 |
|                                         | Pt-N-CNT-Gly                                     | flow-cell | 0.05 M H <sub>2</sub> SO <sub>4</sub> +<br>0.05 M Na <sub>2</sub> SO <sub>4</sub> | 100@-0.2 V | -                                  | ~85% | 30 h@100 mA<br>cm <sup>-2</sup>  | 64 |
|                                         | Se <sub>2</sub> -Pt                              | flow-cell | 0.1 M HClO <sub>4</sub>                                                           | 250@3 V    | 4.16@250 mA cm <sup>-2</sup>       | ~90% | 400 h@250 mA<br>cm <sup>-2</sup> | 3  |
|                                         | PdSe <sub>2</sub>                                | flow-cell | 0.5 M NaPi                                                                        | 5.5@0.3 V  | 0.00356@5.5 mA<br>cm <sup>-2</sup> | ~30% | 3 h@5.5 mA<br>cm <sup>-2</sup>   | 65 |
|                                         | Pd/MCS-8                                         | flow-cell | 0.5 M K <sub>2</sub> SO <sub>4</sub>                                              | 250@0.2 V  | 3.94@0.2 V                         | >86% | 24 h@0.2 V                       | 66 |
|                                         | Pd SNCs/NiTe <sub>2</sub>                        | flow-cell | 0.1 M KOH                                                                         | 100@0 V    | 1.75@100 mA cm <sup>-2</sup>       | 95%  | 10 h@0 V                         | 67 |

**Table S4. Summary of 2e<sup>-</sup> ORR integrated tandem systems from 2022 to 2024**

| electro-catalyst                 | thermo-catalyst | reactor | tandem mode | electrolyte | H <sub>2</sub> O <sub>2</sub> Faradaic efficiency | tandem application    | performance                                            | stability                    | Ref |
|----------------------------------|-----------------|---------|-------------|-------------|---------------------------------------------------|-----------------------|--------------------------------------------------------|------------------------------|-----|
| CNT-NH <sub>2</sub>              | TS-1            | SE-cell | ex-cell     | pure water  | ~80%@200 mA cm <sup>-2</sup>                      | oxidation of ethylene | 2.2 mmol h <sup>-1</sup> and 70% FE of ethylene glycol | 100 h@30 mA cm <sup>-2</sup> | 68  |
| carbon nanofibres                | -               | SE-cell | ex-cell     | pure water  | -                                                 | oxidation of nitrogen | 5.84 nmol s <sup>-1</sup> and 25% FE of nitrates       | -                            | 69  |
| nitric-acid-treated carbon black | TS-1            | SE-cell | ex-cell     | pure water  | 98.1%@-147.1 mA cm <sup>-2</sup>                  | synthesize of glycine | 3.61 mmol g <sup>-1</sup> h <sup>-1</sup> of glycine   | 100 h@10 mA cm <sup>-2</sup> | 70  |

|        |                 |           |         |                                                                                              |                               |                          |                                                                                     |                               |    |
|--------|-----------------|-----------|---------|----------------------------------------------------------------------------------------------|-------------------------------|--------------------------|-------------------------------------------------------------------------------------|-------------------------------|----|
| F-CB   | TS-1            | SE-cell   | in-cell | 0.1 M K <sub>2</sub> SO <sub>4</sub>                                                         | ~80%@37.5 mA cm <sup>-2</sup> | oxidation of phenol      | 30.25% FE and 94.68% selectivity of catechol and hydroquinone                       | 18 h@37.5 mA cm <sup>-2</sup> | 71 |
| C-acid | MIL-53 (Al, Fe) | PEMFC     | in-cell | pure water                                                                                   | ~80%@-0.1~0 V                 | oxidation of propane     | 2.65 μmol h <sup>-1</sup> cm <sup>-2</sup> of C <sub>3</sub> products               | 10 h@-0.2 V                   | 72 |
| C-O    | TS-1            | flow-cell | in-cell | 0.1 M H <sub>2</sub> SO <sub>4</sub>                                                         | -                             | oxidation of propylene   | 4.28 mmol g <sup>-1</sup> h <sup>-1</sup> and 79.7% selectivity of propylene glycol | -                             | 73 |
| a-KB   | -               | H-cell    | in-cell | 0.05 M H <sub>2</sub> SO <sub>4</sub>                                                        | ~90%@0.3~0 V                  | oxidation of methane     | 80.7% selectivity of formic acid                                                    | 6 h@0 V                       | 74 |
| MC-3   | TS-1            | flow-cell | in-cell | 0.1M NaPi (pH=10)                                                                            | ~90%@0.4~0.6 V                | oxidation of ethylene    | 51.48 mmol g <sup>-1</sup> h <sup>-1</sup> of ethylene glycol                       | 50 h@-4 mA cm <sup>-2</sup>   | 75 |
| CB     | TS-1            | SE-cell   | in-cell | pure water                                                                                   | >80%@50 mA cm <sup>-2</sup>   | oxidation of ethylene    | 99.7% selectivity of ethylene glycol                                                | 200 h@10 mA cm <sup>-2</sup>  | 76 |
| PDC@VG | -               | flow-cell | in-cell | 0.5 M H <sub>2</sub> SO <sub>4</sub><br>+ 0.5 M C <sub>2</sub> H <sub>4</sub> O <sub>2</sub> | >80%@0.2~0.4 V                | oxidation of acetic acid | 58.5 μmol cm <sup>-2</sup> h <sup>-1</sup> of peracetic acid                        | 7 h@-1.6 V                    | 77 |
| CB     | -               | flow-cell | in-cell | 1 mol L <sup>-1</sup> HCOOH/CHO OK + 1 wt% H <sub>3</sub> PO <sub>4</sub>                    | -                             | oxidation of formic acid | 24% conversion of performic acid                                                    | 6 h@100 mA cm <sup>-2</sup>   | 78 |

|                                         |        |           |         |                                                                                             |                |                                                                |                                                                                           |                                 |    |
|-----------------------------------------|--------|-----------|---------|---------------------------------------------------------------------------------------------|----------------|----------------------------------------------------------------|-------------------------------------------------------------------------------------------|---------------------------------|----|
| CB-3                                    | Ti-MOR | flow-cell | in-cell | 1 M<br>NH <sub>4</sub> HCO <sub>3</sub>                                                     | ~80%@0.4~0.7 V | ammoxidations of<br>cyclohexanone                              | 96% FE and 99%<br>selectivity of<br>cyclohexanone oxime                                   | 45 h@0.1 V                      | 79 |
| Co-N-C                                  | TS-1   | H-cell    | in-cell | 0.5 M H <sub>2</sub> SO <sub>4</sub>                                                        | >90%@0.1~0.3 V | oxidation of phenol                                            | 30.05% FE and 99.45%<br>selectivity of bisphenol                                          | -                               | 80 |
| Mg <sub>3</sub> (HHT<br>P) <sub>2</sub> | TS-1   | flow-cell | in-cell | pure water                                                                                  | ~90%@1.6~2.6 V | oxidation of<br>propylene                                      | 99% selectivity of<br>propylene oxide                                                     | 8 h@20 mA<br>cm <sup>-2</sup>   | 81 |
| FeSAs/AC<br>s-BCC                       | -      | H-cell    | in-cell | 0.1 M Na <sub>2</sub> SO <sub>4</sub><br>(pH~2.43) +<br>10 mM EG +<br>1 mM Fe <sup>2+</sup> | >90%@0.2~0.7 V | oxidation of ethylene<br>glycol                                | 86.2% selectivity of<br>formic acid                                                       | -                               | 82 |
| Co-O-C                                  | -      | flow-cell | in-cell | 0.1 M KHCO <sub>3</sub><br>+ 0.05 M<br>KNO <sub>3</sub>                                     | >70%@0.3~0.6 V | oxidation of urea                                              | 4648.2 μg h <sup>-1</sup> mg <sup>-1</sup> and<br>53% FE of urea<br>peroxide              | -                               | 83 |
| Mn-NO-<br>C <sub>H</sub>                | -      | flow-cell | in-cell | 1 M KOH                                                                                     | >80%@0~0.6 V   | hydration of<br>benzonitrile                                   | 100% conversion of<br>benzonitrile                                                        | 55 h@0.1 V                      | 84 |
| Ag foil                                 | -      | H-cell    | in-cell | 0.1 M HClO <sub>4</sub><br>+ 2 mM Fe <sup>2+</sup>                                          | ~90%@0.2 V     | oxidation of methane                                           | 11.5 mmol h <sup>-1</sup> g <sub>Fe</sub> <sup>-1</sup> and<br>81.4% FE of formic<br>acid | 8 h@0.2 V                       | 85 |
| CoPorF/C<br>NT                          | -      | flow-cell | in-cell | pure water                                                                                  | >90%@0.2~0.5 V | hydroxylation of<br>phenol                                     | 94.7% selectivity of<br>dihydroxy benzene                                                 | 48 h@ 50 mA<br>cm <sup>-2</sup> | 57 |
| B/N-onion<br>carbon                     | -      | flow-cell | in-cell | 1 M KOH                                                                                     | >80%@0.2~0.7 V | synthesize of sodium<br>peroxyborate and<br>dibenzoyl peroxide | -                                                                                         | 10 h@0.7 V                      | 86 |
| c-<br>NiSe <sub>2</sub> /CFP            | -      | H-cell    | in-cell | 0.1 M<br>NaHSO <sub>4</sub> /Na <sub>2</sub> S                                              | >60%@0~0.6 V   | oxidation of glycerol                                          | 55% conversion of C <sub>3</sub><br>products                                              | 37 h@0.6 V                      | 87 |

| O <sub>4</sub> (pH ~2.8) |   |           |         |                                                                                                     |   |                                                 |                                                                          |                                  |    |
|--------------------------|---|-----------|---------|-----------------------------------------------------------------------------------------------------|---|-------------------------------------------------|--------------------------------------------------------------------------|----------------------------------|----|
| T-NiOC                   | - | flow-cell | in-cell | 0.4 M NaOH<br>+ saturated<br>Ca(OH) <sub>2</sub>                                                    | - | synthesis of alkaline-<br>earth metal peroxides | 99% selectivity of<br>calcium peroxide                                   | 1000 h@50<br>mA cm <sup>-2</sup> | 88 |
| graphite<br>rod          | - | H-cell    | in-cell | 0.25 M<br>LiSO <sub>4</sub> /H <sub>2</sub> SO <sub>4</sub><br>(pH=3) with 1<br>Mm Fe <sup>2+</sup> | - | oxidation of nitrogen                           | 141.83 μmol h <sup>-1</sup> g <sup>-1</sup> and<br>25.37% FE of nitrates | 10 h@0 V                         | 89 |

## References:

1. Y. Long, J. Lin, F. Ye, W. Liu, D. Wang, Q. Cheng, R. Paul, D. Cheng, B. Mao, R. Yan, L. Zhao, D. Liu, F. Liu and C. Hu, *Advanced Materials*, 2023, **35**, 2303905.
2. H. Huang, M. Sun, S. Li, S. Zhang, Y. Lee, Z. Li, J. Fang, C. Chen, Y.-X. Zhang, Y. Wu, Y. Che, S. Qian, W. Zhu, C. Tang, Z. Zhuang, L. Zhang and Z. Niu, *Journal of the American Chemical Society*, 2024, **146**, 9434-9443.
3. Z. Yu, H. Deng, Q. Yao, L. Zhao, F. Xue, T. He, Z. Hu, W.-H. Huang, C.-W. Pao, L.-M. Yang and X. Huang, *Nature Communications*, 2024, **15**, 9346.
4. Z. Chen, S. Chen, S. Siahrostami, P. Chakthranont, C. Hahn, D. Nordlund, S. Dimosthenis, J. K. Nørskov, Z. Bao and T. F. Jaramillo, *Reaction Chemistry & Engineering*, 2017, **2**, 239-245.
5. J. Yang, R. Ding, C. Liu, Q. Xu, S. Liu and X. Yin, *Journal of Physics: Energy*, 2024, **6**, 015022.
6. H. Li, P. Wen, D. S. Itanze, Z. D. Hood, S. Adhikari, C. Lu, X. Ma, C. Dun, L. Jiang, D. L. Carroll, Y. Qiu and S. M. Geyer, *Nature Communications*, 2020, **11**, 3928.
7. H. Zou, L. J. Arachchige, H. Dai, H. Liu, F. Jiao, W. Hu, F. Li, S. Wei, C. Sun and L. Duan, *Chem Catalysis*, 2023, **3**, 100583.
8. C. Xia, Y. Xia, P. Zhu, L. Fan and H. Wang, *Science*, 2019, **366**, 226-231.
9. X. Zhang, X. Zhao, P. Zhu, Z. Adler, Z.-Y. Wu, Y. Liu and H. Wang, *Nature Communications*, 2022, **13**, 2880.
10. B. Sabri Rawah, M. Albloushi and W. Li, *Chemical Engineering Journal*, 2023, **466**, 143282.
11. R. Xie, C. Cheng, R. Wang, J. Li, E. Zhao, Y. Zhao, Y. Liu, J. Guo, P. Yin and T. Ling, *ACS Catalysis*, 2024, **14**, 4471-4477.
12. W. Wang, Y. Hu, Y. Liu, Z. Zheng and S. Chen, *ACS Applied Materials & Interfaces*, 2018, **10**, 31855-31859.
13. C. Zhang, W. Shen, K. Guo, M. Xiong, J. Zhang and X. Lu, *Journal of the American Chemical Society*, 2023, **145**, 11589-11598.
14. Z. Mou, Y. Mu, L. Liu, D. Cao, S. Chen, W. Yan, H. Zhou, T.-S. Chan, L.-Y. Chang and X. Fan, *Small*, 2024, **20**, 2400564.
15. Q. Tian, L. Jing, Y. Yin, Z. Liang, H. Du, L. Yang, X. Cheng, D. Zuo, C. Tang, Z. Liu, J. Liu, J. Wan and J. Yang, *Nano Lett*, 2024, **24**, 1650-1659.
16. Q. Tian, L. Jing, H. Du, Y. Yin, X. Cheng, J. Xu, J. Chen, Z. Liu, J. Wan, J. Liu and J. Yang, *Nature Communications*, 2024, **15**, 983.
17. Q. Yuan, M. Fan, Y. Zhao, J. Wu, J. Raj, Z. Wang, A. Wang, H. Sun, X. Xu, Y. Wu, K. Sun and J. Jiang, *Applied Catalysis B: Environmental*, 2023, **324**, 122195.
18. Z. Yang, Y. Gao, L. Zuo, C. Long, C. Yang and X. Zhang, *ACS Catalysis*, 2023, **13**, 4790-4798.
19. Y. Wu, Q. Yuan, Y. Zhao, X. Xu, J. Xu, Y. Wang, K. Sun, A. Wang, H. Sun, B. Li, R. Xu, Z. Wang, J. Jiang and M. Fan, *ACS Sustainable Chemistry & Engineering*, 2023, **11**, 13363-13373.
20. J. Su, L. Jiang, B. Xiao, Z. Liu, H. Wang, Y. Zhu, J. Wang and X. Zhu, *Small*, 2024, **20**, 2310317.
21. X. Shen, Z. Wang, H. Guo, Z. Lei, Z. Liu and L. Wang, *Small*, 2023, **19**, 2303156.

22. B. Qiu, M. Liu, X. Qu, F. Zhou, H. Xie, D. Wang, L. Y. S. Lee and H. Yin, *Nature Communications*, 2024, **15**, 6473.
23. M. Fan, Z. Wang, Y. Zhao, Q. Yuan, J. Cui, J. Raj, K. Sun, A. Wang, J. Wu, H. Sun, B. Li, L. Wang and J. Jiang, *Carbon Energy*, 2023, **5**, e309.
24. M. Fan, Z. Wang, K. Sun, A. Wang, Y. Zhao, Q. Yuan, R. Wang, J. Raj, J. Wu, J. Jiang and L. Wang, *Advanced Materials*, 2023, **35**, 2209086.
25. A. Byeon, J. W. Choi, H. W. Lee, W. C. Yun, W. Zhang, C.-K. Hwang, S. Y. Lee, S. S. Han, J. M. Kim and J. W. Lee, *Applied Catalysis B: Environmental*, 2023, **329**, 122557.
26. Y. Wang, R. Shi, L. Shang, L. Peng, D. Chu, Z. Han, G. I. N. Waterhouse, R. Zhang and T. Zhang, *Nano Energy*, 2022, **96**, 107046.
27. Z. Tian, Q. Zhang, L. Thomsen, N. Gao, J. Pan, R. Daiyan, J. Yun, J. Brandt, N. López-Salas, F. Lai, Q. Li, T. Liu, R. Amal, X. Lu and M. Antonietti, *Angewandte Chemie International Edition*, 2022, **61**, e202206915.
28. H. Li, E. Quispe-Cardenas, S. Yang, L. Yin and Y. Yang, *ACS ES&T Engineering*, 2022, **2**, 242-250.
29. J. Qu, G. Long, L. Luo, Y. Yang, W. Fan and F. Zhang, *Small*, 2024, **20**, 2400695.
30. Y. Fan, Y. Chen, W. Ge, L. Dong, Y. Qi, C. Lian, X. Zhou, H. Liu, Z. Liu, H. Jiang and C. Li, *Journal of the American Chemical Society*, 2024, **146**, 7575-7583.
31. L. Jing, Q. Tian, W. Wang, X. Li, Q. Hu, H. Yang and C. He, *Advanced Energy Materials*, 2024, **14**, 2304418.
32. Z. Song, X. Chi, S. Dong, B. Meng, X. Yu, X. Liu, Y. Zhou and J. Wang, *Angewandte Chemie International Edition*, 2024, **63**, e202317267.
33. Y. Wang, B. Li, G. Chen, Y. Wu, M. Tian, Y. Peng, S. Dou, L. Li and J. Sun, *Environmental Science & Technology*, 2024, DOI: 10.1021/acs.est.4c11612.
34. Q. Wu, H. Zou, X. Mao, J. He, Y. Shi, S. Chen, X. Yan, L. Wu, C. Lang, B. Zhang, L. Song, X. Wang, A. Du, Q. Li, Y. Jia, J. Chen and X. Yao, *Nature Communications*, 2023, **14**, 6275.
35. Z. Bao, Q. Cao, Y. Shao, S. Zhang, X. Peng, Y. Li, C. Jiang, X. Zhong and J. Wang, *ACS Catalysis*, 2023, **13**, 14492-14502.
36. Z. Bao, J. Zhao, S. Zhang, L. Ding, X. Peng, G. Wang, Z. Zhao, X. Zhong, Z. Yao and J. Wang, *Journal of Materials Chemistry A*, 2022, **10**, 4749-4757.
37. F. She, Z. Guo, F. Liu, Z. Yu, J. Chen, Y. Fan, Y. Lei, Y. Chen, H. Li and L. Wei, *ACS Catalysis*, 2024, **14**, 10928-10938.
38. S. Jia, H. Yu, J. Na, Z. Liu, K. Lv, Z. Ren, S. Sun and Z. Shao, *ACS Applied Materials & Interfaces*, 2024, **16**, 23099-23108.
39. C.-D. Han, Y.-C. Zhang, Q. Zhang, J.-T. Wu, J. Gao, J.-J. Zou and X.-D. Zhu, *Rare Metals*, 2024, **43**, 500-510.
40. J. Du, G. Han, W. Zhang, L. Li, Y. Yan, Y. Shi, X. Zhang, L. Geng, Z. Wang, Y. Xiong, G. Yin and C. Du, *Nature Communications*, 2023, **14**, 4766.
41. P. Cao, X. Quan, X. Nie, K. Zhao, Y. Liu, S. Chen, H. Yu and J. G. Chen, *Nature Communications*, 2023, **14**, 172.
42. J. Zhang, W. Liu, F. He, M. Song, X. Huang, T. Shen, J. Li, C. Zhang, J. Zhang and D. Wang, *Chemical Engineering Journal*, 2022, **438**, 135619.
43. Z. Lin, Q. Zhang, J. Pan, C. Tsounis, A. A. Esmailpour, S. Xi, H. Y. Yang, Z. Han, J. Yun, R. Amal and X. Lu, *Energy & Environmental Science*, 2022, **15**, 1172-1182.
44. X. Huang, W. Liu, J. Zhang, M. Song, C. Zhang, J. Li, J. Zhang and D. Wang, *ACS Applied Materials & Interfaces*, 2022, **14**, 11350-11358.



45. S. Chen, T. Luo, K. Chen, Y. Lin, J. Fu, K. Liu, C. Cai, Q. Wang, H. Li, X. Li, J. Hu, H. Li, M. Zhu and M. Liu, *Angewandte Chemie International Edition*, 2021, **60**, 16607-16614.
46. Y. Chen, C. Zhen, Y. Chen, H. Zhao, Y. Wang, Z. Yue, Q. Wang, J. Li, M. D. Gu, Q. Cheng and H. Yang, *Angewandte Chemie International Edition*, 2024, **63**, e202407163.
47. Y. Zhou, L. Xu, J. Wu, W. Zhu, T. He, H. Yang, H. Huang, T. Cheng, Y. Liu and Z. Kang, *Energy & Environmental Science*, 2023, **16**, 3526-3533.
48. Y. Zhang, M. Wang, W. Zhu, M. Fang, M. Ma, F. Liao, H. Yang, T. Cheng, C.-W. Pao, Y.-C. Chang, Z. Hu, Q. Shao, M. Shao and Z. Kang, *Angewandte Chemie International Edition*, 2023, **62**, e202218924.
49. B. Xia, Q. Huang, H. Wang, L. Yu, S. Ding, L. Jiang, M. Li, J. Duan and S. Chen, *ACS Applied Materials & Interfaces*, 2023, **15**, 32416-32424.
50. S. Geng, Y. Ji, S. Yang, J. Su, Z. Hu, T.-S. Chan, H. Yu, Y. Li, Y.-Y. Chin, X. Huang and Q. Shao, *Advanced Functional Materials*, 2023, **33**, 2300636.
51. S. Ding, Y. Zhang, F. Lou, M. Li, Q. Huang, K. Yang, B. Xia, C. Tang, J. Duan, M. Antonietti and S. Chen, *Materials Today Energy*, 2023, **38**, 101430.
52. S. Ding, B. Xia, M. Li, F. Lou, C. Cheng, T. Gao, Y. Zhang, K. Yang, L. Jiang, Z. Nie, H. Guan, J. Duan and S. Chen, *Energy & Environmental Science*, 2023, **16**, 3363-3372.
53. S. Chen, T. Luo, J. Wang, J. Xiang, X. Li, C. Ma, C.-w. Kao, T.-S. Chan, Y.-N. Liu and M. Liu, *Angewandte Chemie International Edition*, 2024, **n/a**, e202418713.
54. W. Wang, Y. Hu, P. Li, Y. Liu and S. Chen, *ACS Catalysis*, 2024, **14**, 5961-5971.
55. W. Liu, R. Chen, Z. Sang, Z. Li, J. Nie, L. Yin, F. Hou and J. Liang, *Advanced Materials*, 2024, **36**, 2406403.
56. Y. Yao, H. Wang, K. Dong, H. Li, J. Liang, R. Li, S. Sun, Z. Cai, X. He, D. Zheng, Y. Luo, S. Alfaifi, D. Ma, W. Hu and X. Sun, *Journal of Materials Chemistry A*, 2023, **11**, 22154-22160.
57. C. Liu, Z. Yu, F. She, J. Chen, F. Liu, J. Qu, J. M. Cairney, C. Wu, K. Liu, W. Yang, H. Zheng, Y. Chen, H. Li and L. Wei, *Energy & Environmental Science*, 2023, **16**, 446-459.
58. Y. Zeng, X. Tan, Z. Zhuang, C. Chen and Q. Peng, *Angewandte Chemie International Edition*, 2024, **n/a**, e202416715.
59. H. Gong, Z. Gong, J. Liu, G. Ye and H. Fei, *Advanced Functional Materials*, 2024, **34**, 2316438.
60. K. Yu, H. Yang, J. Xu, W. Yuan, R. Yang, M. Hou, Z. Kang, Y. Liu, P. W. Menezes and Z. Chen, *Angewandte Chemie International Edition*, 2024, **63**, e202408508.
61. Q. Zhi, R. Jiang, X. Yang, Y. Jin, D. Qi, K. Wang, Y. Liu and J. Jiang, *Nature Communications*, 2024, **15**, 678.
62. X. Zhou, Y. Min, C. Zhao, C. Chen, M.-K. Ke, S.-L. Xu, J.-J. Chen, Y. Wu and H.-Q. Yu, *Nature Communications*, 2024, **15**, 193.
63. Z. Yu, S. Lv, Q. Yao, N. Fang, Y. Xu, Q. Shao, C.-W. Pao, J.-F. Lee, G. Li, L.-M. Yang and X. Huang, *Advanced Materials*, 2023, **35**, 2208101.
64. B. Ni, P. Shen, G. Zhang, J. Zhao, H. Ding, Y. Ye, Z. Yue, H. Yang, H. Wei and K. Jiang, *Journal of the American Chemical Society*, 2024, **146**, 11181-11192.

65. R. D. Ross, K. Lee, G. J. Quintana Cintrón, K. Xu, H. Sheng, J. R. Schmidt and S. Jin, *Journal of the American Chemical Society*, 2024, **146**, 15718-15729.
66. L. Jing, W. Wang, Q. Tian, Y. Kong, X. Ye, H. Yang, Q. Hu and C. He, *Angewandte Chemie International Edition*, 2024, **63**, e202403023.
67. Y. Li, Y. Liu, X. Peng, Z. Zhao, Z. Li, B. Yang, Q. Zhang, L. Lei, L. Dai and Y. Hou, *Angewandte Chemie International Edition*, 2024, **n/a**, e202413159.
68. L. Fan, Y. Zhao, L. Chen, J. Chen, J. Chen, H. Yang, Y. Xiao, T. Zhang, J. Chen and L. Wang, *Nature Catalysis*, 2023, **6**, 585-595.
69. K. Dong, Y. Yao, H. Li, H. Li, S. Sun, X. He, Y. Wang, Y. Luo, D. Zheng, Q. Liu, Q. Li, D. Ma, X. Sun and B. Tang, *Nature Synthesis*, 2024, **3**, 763-773.
70. X. Kong, C. Liu, Z. Xu, J. Zhao, J. Ni, H. Li, T. Zheng, C. Xia, Z. Geng and J. Zeng, *Angewandte Chemie International Edition*, 2024, **63**, e202411160.
71. H. Zhang, S. Wu, X. Huang, L. Li, Q. Liao and Z. Wei, *Chemical Engineering Journal*, 2022, **428**, 131534.
72. C.-H. Yang, X.-C. Liu, Y. Li, S. Yuan, T. Wang, Z.-Y. Zhou and S.-G. Sun, *ChemSusChem*, 2023, **16**, e202300699.
73. X.-C. Liu, W.-K. Yao, B.-Y. Su, Y.-H. Hong, T. Wang, Z.-Y. Zhou and S.-G. Sun, *Electrochemistry Communications*, 2023, **151**, 107510.
74. J. Kim, J. H. Kim, C. Oh, H. Yun, E. Lee, H.-S. Oh, J. H. Park and Y. J. Hwang, *Nature Communications*, 2023, **14**, 4704.
75. M.-H. Guan, L.-Y. Dong, T. Wu, W.-C. Li, G.-P. Hao and A.-H. Lu, *Angewandte Chemie International Edition*, 2023, **62**, e202302466.
76. S.-K. Zhang, Y. Feng, A. Elgazzar, Y. Xia, C. Qiu, Z. Adler, C. Sellers and H. Wang, *Joule*, 2023, **7**, 1887-1901.
77. Z. Lin, Felice, G. E. P. O'Connell, T. Wan, D. Zhang, L. Peng, D. Chu, X. Lu and Z. Han, *Chemical Engineering Journal*, 2024, **481**, 148736.
78. S. Schneider and M. Stöckl, *ACS Sustainable Chemistry & Engineering*, 2024, **12**, 5160-5168.
79. Y. Yuan, L. Chen, Z. Wan, K. Shi, X. Teng, H. Xu, P. Wu and J. Shi, *Science Advances*, **10**, ead01755.
80. S. Wu, H. Zhang, X. Huang and Z. Wei, *Chemical Communications*, 2022, **58**, 8942-8945.
81. K. Dong, Y. Wang, L. Zhang, X. Fan, Z. Li, D. Zhao, L. Yue, S. Sun, Y. Luo, Q. Liu, A. A. Alshehri, Q. Li, D. Ma and X. Sun, *Green Chemistry*, 2022, **24**, 8264-8269.
82. H. Xu, S. Zhang, X. Zhang, M. Xu, M. Han, L. R. Zheng, Y. Zhang, G. Wang, H. Zhang and H. Zhao, *Angewandte Chemie International Edition*, 2023, **62**, e202314414.
83. S. Zhang, M. Jin, H. Xu, X. Zhang, T. Shi, Y. Ye, Y. Lin, L. Zheng, G. Wang, Y. Zhang, H. Yin, H. Zhang and H. Zhao, *Energy & Environmental Science*, 2024, **17**, 1950-1960.
84. L.-Y. Dong, J.-S. Wang, T.-Y. Li, T. Wu, X. Hu, Y.-T. Wu, M.-Y. Zhu, G.-P. Hao and A.-H. Lu, *Angewandte Chemie International Edition*, 2024, **63**, e202317660.
85. Y. Song, X. Yang, H. Liu, S. Liang, Y. Cai, W. Yang, K. Zhu, L. Yu, X. Cui and D. Deng, *Journal of the American Chemical Society*, 2024, **146**, 5834-5842.
86. J. Qi, Y. Du, Q. Yang, N. Jiang, J. Li, Y. Ma, Y. Ma, X. Zhao and J. Qiu, *Nature Communications*, 2023, **14**, 6263.
87. H. Sheng, A. N. Janes, R. D. Ross, H. Hofstetter, K. Lee, J. R. Schmidt and S. Jin, *Nature Catalysis*, 2022, **5**, 716-725.
88. M. Wang, J. Cheng, W. Xu, D. Zhu, W. Zhang, Y. Wen, W. Guan, J. Jia and Z. Lu, *Nature Nanotechnology*, 2024, DOI: 10.1038/s41565-024-01815-x.
89. S. Chen, S. Liang, R. Huang, M. Zhang, Y. Song, Y. Zhang, S. Tao, L. Yu and D. Deng, *Nature Synthesis*, 2024, **3**, 76-84.
